# Supplementary material for: The Interplay between S-Glutathionylation and Phosphorylation of Cardiac Troponin I and Myosin Binding Protein C in End-Stage Human Failing Hearts
Source: MDPI journal article supplement (doi:10.3390/antiox10071134), 2021-07-16
Supplement: s1 [file s1]

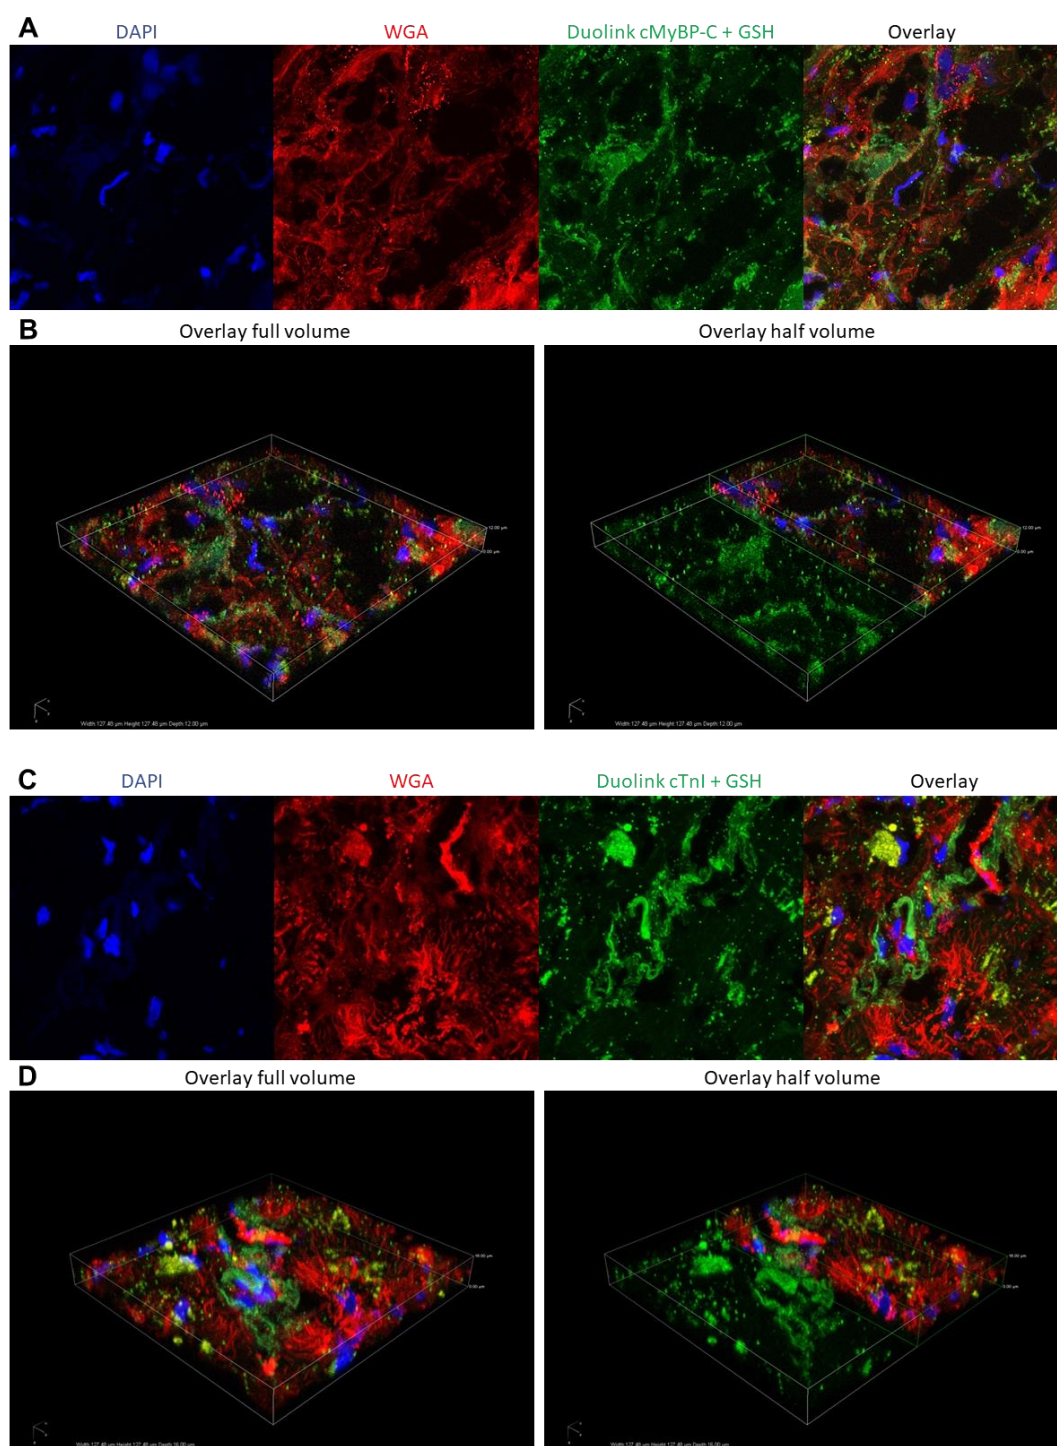

**Figure S1. cMyBP-C and cTnI S-glutathionylation in HF tissues** **A.** Representative immunofluorescence confocal images (maximum intensity projection of z-stacks) of cardiomyocytes stained with DAPI (blue), WGA (red), and Duolink *in Situ* detection of GSH and cMyBP-C interaction (green). **B.** Representative images of Duolink *in Situ* detection of GSH and cMyBP-C interaction in a z-stack. **C.** Representative immunofluorescence confocal images (maximum intensity projection of z-stacks) of cardiomyocytes stained with DAPI (blue), WGA (red), and Duolink *in Situ* detection of GSH and cTnI interaction (green). **D.** Representative images of Duolink *in Situ* detection of GSH and cTnI interaction in a z-stack.
